# Supplementary material for: Response to Emerging Infection Leading to Outbreak of Linezolid-Resistant Enterococci
Source: PubMed Central journal article supplement (PMC2878236; doi:10.3201/eid1307.070019), 2007-07
Supplement: 07-0019_appT-s1.pdf [file 07-0019_appT-s1.pdf]

**Appendix Table.** Demographics, laboratory data, risk factors, and outcomes for case-patients with linezolid-resistant enterococci (LRE) and for control-patients with linezolid-sensitive enterococci (LSE) infection\*

| Variable                                                   | Case-patients<br>with LRE† (N =<br>15)‡ | Control patients<br>with LSE† (N =<br>60) | Odds ratio (95%<br>confidence interval) |
|------------------------------------------------------------|-----------------------------------------|-------------------------------------------|-----------------------------------------|
| <b>Demographics</b>                                        |                                         |                                           |                                         |
| <b>Sex</b>                                                 |                                         |                                           |                                         |
| Male                                                       | 7 (47)                                  | 19 (32)                                   |                                         |
| Female                                                     | 8 (53)                                  | 41 (68)                                   | 0.5 (0.2–1.9)                           |
| <b>Race</b>                                                |                                         |                                           |                                         |
| White                                                      | 2 (13)                                  | 16 (27)                                   |                                         |
| Black                                                      | 12 (80)                                 | 41 (68)                                   | 1.9 (0.4–9.4)§                          |
| Other                                                      | 0                                       | 1 (2)                                     |                                         |
| Unknown                                                    | 1 (7)                                   | 2 (3)                                     |                                         |
| Age, median years (range)                                  | 54 (38–74)                              | 65 (20–93)                                | p = 0.09                                |
| <b>Laboratory data</b>                                     |                                         |                                           |                                         |
| <b>Species information</b>                                 |                                         |                                           |                                         |
| <i>Enterococcus faecalis</i>                               | 13 (87)                                 | 53 (88)                                   | 0.9 (0.1–6.8)                           |
| <i>E. faecium</i>                                          | 2 (13)                                  | 7 (12)                                    |                                         |
| <b>Source of index isolate</b>                             |                                         |                                           |                                         |
| Invasive site                                              | 8 (53)                                  | 12 (20)                                   | 4.6 (1.2–17.9)                          |
| Blood                                                      | 7 (47)                                  | 12 (20)                                   |                                         |
| Peritoneal fluid                                           | 1 (7)                                   | 0                                         |                                         |
| Urine                                                      | 4 (27)                                  | 36 (60)                                   |                                         |
| Wound                                                      | 2 (13)                                  | 6 (10)                                    |                                         |
| Catheter tip                                               | 1 (7)                                   | 2 (3)                                     |                                         |
| Other                                                      | 0                                       | 4 (7)                                     |                                         |
| Susceptibility, vancomycin resistant                       | 7 (47)                                  | 11 (18)                                   | 3.9 (1.0–15.2)                          |
| <b>Risk factors</b>                                        |                                         |                                           |                                         |
| <b>Antimicrobial drug treatment</b>                        |                                         |                                           |                                         |
| Mean no. agents used in previous 12 mo                     | 13                                      | 6                                         | p = 0.004                               |
| Median no. days used in previous 12 mo                     | 58                                      | 18                                        | p = 0.003                               |
| <b>Linezolid treatment</b>                                 |                                         |                                           |                                         |
| Use in prior 12 mo                                         | 8 (53)                                  | 9 (15)                                    | 6.5 (1.6–26.5)                          |
| <b>Time interval (d) between any use and index culture</b> |                                         |                                           |                                         |
| 14                                                         | 4 (27)                                  | 3 (5)                                     | 9.7 (1.3–76.8)                          |
| 30                                                         | 4 (27)                                  | 7 (12)                                    | 4.2 (0.7–21.7)                          |
| 60                                                         | 7 (47)                                  | 7 (12)                                    | 7.3 (1.6–32.7)                          |
| 90                                                         | 7 (47)                                  | 8 (13)                                    | 6.4 (1.4–27.6)                          |
| 365                                                        | 8 (53)                                  | 9 (15)                                    | 6.5 (1.6–26.5)                          |
| No linezolid exposure                                      | 7 (47)                                  | 51 (85)                                   | Referent                                |

|                                                                                                |             |            |                                |
|------------------------------------------------------------------------------------------------|-------------|------------|--------------------------------|
| Length of treatment, determined using all patients, median no. d (range)                       | 15 (0–32)   | 0 (0–25)   | p = 0.009                      |
| Length of treatment, determined using only patients prescribed linezolid, median no. d (range) | 17.5 (6–32) | 8.0 (4–25) | p = 0.06                       |
| MRSA clinical isolate prior to index culture                                                   | 10 (40)     | 8 (3)      | 13 (3.0–60.4)                  |
| Stratification of linezolid exposure by MRSA                                                   |             |            |                                |
| Prior MRSA (n = 10)                                                                            |             |            |                                |
| Linezolid exposure                                                                             | 5 (50)      | 3 (38)     | 1.7 (0.2–16.8)                 |
| No linezolid exposure                                                                          | 5 (50)      | 5 (63)     |                                |
| No prior MRSA (n = 5)                                                                          |             |            |                                |
| Linezolid exposure                                                                             | 3 (60)      | 6 (12)     | 11.5 (1.0–152.8), FE = 0.02    |
| No linezolid exposure                                                                          | 2 (40)      | 46 (88)    |                                |
| Stratification of prior MRSA by linezolid exposure                                             |             |            |                                |
| Linezolid exposure (n = 8)                                                                     |             |            |                                |
| Prior MRSA                                                                                     | 5 (63)      | 3 (33)     | 3.3 (0.3–37.6)                 |
| No prior MRSA                                                                                  | 3 (38)      | 6 (67)     |                                |
| No linezolid exposure (n = 7)                                                                  |             |            |                                |
| Prior MRSA                                                                                     | 5 (71)      | 5 (10)     | 23.0 (2.6–272.0)               |
| No prior MRSA                                                                                  | 2 (29)      | 46 (90)    |                                |
| Hospitalization                                                                                |             |            |                                |
| Median no. total days (range) hospitalized                                                     | 35 (1–127)  | 11 (1–140) | p<0.001                        |
| Median no. days (range) hospitalized before index culture                                      | 20 (1–94)   | 4 (0–44)   | p<0.001                        |
| Median no. days (range) hospitalized after index culture                                       | 19 (1–50)   | 9†(1–121)  | p = 0.002                      |
| Location in hospital A during 90 d before index culture                                        |             |            |                                |
| Any critical care area                                                                         | 8 (53)      | 13 (22)    | 4.1 (1.1–16.0)                 |
| In 1 of 3 specific critical care areas                                                         | 6 (40)      | 4 (7)      | 11.0 (2.1–61.4)                |
| Medical-surgical ICU                                                                           | 3 (20)      | 2 (3)      | 7.3 (0.7–92.0)                 |
| Extended postoperative holding area                                                            | 3 (20)      | 1 (2)      | 14.8 (1.0–786.8)               |
| Ventilator rehabilitation unit                                                                 | 4 (27)      | 1 (2)      | 21.5 (1.8–1073.4)              |
| Orthopedic/neurosurgical ward                                                                  | 2 (13)      | 0          | Undefined, Wald estimate = 95  |
| Inpatient in hospital A during September 2004                                                  | 2 (13)      | 0          | Undefined, Wald estimate = 95  |
| Inpatient in hospital A during January–February 2005                                           | 4 (27)      | 0          | Undefined, Wald estimate = 222 |
| Located in medical-surgical ICU (January)                                                      | 2 (13)      | 0          | Undefined, Wald estimate = 95  |
| Located in ventilator rehabilitation unit (February)                                           | 2 (13)      | 0          | Undefined, Wald estimate = 95  |
| Instrumentation (receipt of the following)                                                     |             |            |                                |
| Ventilator                                                                                     | 8 (53)      | 10 (17)    | 5.7 (1.5–23.3)                 |
| Foley catheter                                                                                 | 11 (73)     | 27 (45)    | 3.4 (0.9–14.3)                 |

|                                                          |            |            |                       |
|----------------------------------------------------------|------------|------------|-----------------------|
| Peripheral inserted central catheter                     | 10 (67)    | 29 (48)    | 2.1 (0.6–8.3)         |
| Central venous catheter                                  | 4 (27)     | 14 (23)    | 1.2 (0.2–4.9)         |
| Chest tube                                               | 3 (20)     | 0          | Undefined, FE = 0.007 |
| Permanent central venous catheter                        | 2 (13)     | 8 (13)     | 1.0 (0.1–5.9)         |
| Arterial line                                            | 0          | 1 (2)      | 0 (0–156)             |
| Dialysis catheter                                        | 1 (7)      | 5 (8)      | 0.8 (0–7.9)           |
| Balloon pump                                             | 0          | 0          | –                     |
| Pulmonary artery catheter                                | 0          | 0          | –                     |
| Intraabdominal surgery                                   | 1 (7)      | 3 (5)      | 1.4 (0–18.4)          |
| Other surgery                                            | 3 (20)     | 10 (17)    | 1.3 (0.2–5.9)         |
| Outcome                                                  |            |            |                       |
| Death                                                    | 6 (40)     | 4 (7)      | 9.3 (1.7–52.4)        |
| Median no. total days (range) of hospitalization         | 35 (1–127) | 11 (1–140) | p<0.001               |
| Median no. days (range) hospitalized after index culture | 19 (1-50)  | 9 (1–121)  | p = 0.002             |

---

\*MRSA, methicillin-resistant *Staphylococcus aureus*; ICU, intensive care unit; FE, Fisher exact test (as opposed to p value).

†Data are no. (%) unless otherwise noted in first column.

‡N = 15, unless otherwise indicated in first column.

§Black compared with all other races.

¶Invasive compared with noninvasive isolates.
